# Supplementary material for: STM/TERS observation of (M)-type diphenyl[7]thiaheterohelicene on Ag(111)
Source: Royal Society of Chemistry journal article supplement (doi:10.1039/d3cp05813a), 2024-01-01
Supplement: d3cp05813a1.pdf [file d3cp05813a1.pdf]

## Supplementary Materials

# STM/TERS observation of (*M*)-type diphenyl [7]thiaheterohelicene on Ag(111)

Sho Kimura<sup>a</sup>, Takuma Hattori<sup>\*a</sup>, Changqing Ye<sup>a</sup>, Masaki Okada<sup>a</sup>, Satoshi Kondo<sup>b</sup>  
Yui Sakurama<sup>b</sup>, Akira Saito<sup>a</sup>, Pawel Krukowski<sup>c</sup>, Hideji Osuga<sup>b</sup> and Yuji Kuwahara<sup>a</sup>

a : Department of Precision Engineering, Graduate School of Engineering, Osaka University,  
Suita, Osaka 565-0871, Japan Fax: +81 4-7136-7299; Tel: +81 4-7136-7299;

b : Faculty of Systems Engineering, Wakayama University, Wakayama 640-8510, Japan

c : Department of Solid State Physics, Faculty of Physics and Applied Informatics, University of Lodz, 90-236 Lodz,  
Poland

E-mail: hattori@prec.eng.osaka-u.ac.jp

## Synthesis and Optical resolution of Ph-[7]TH

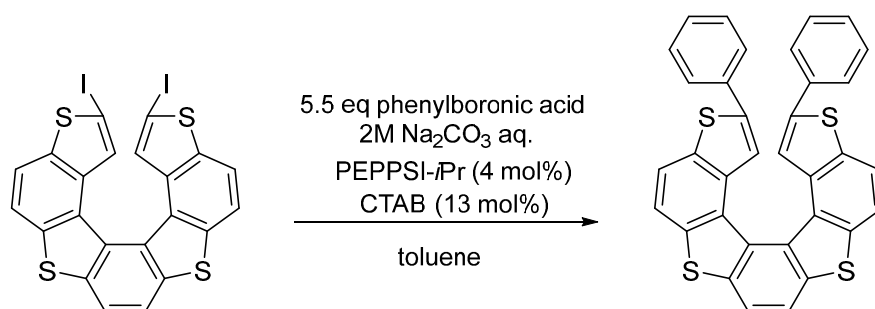

**Scheme S1.** Synthesis of Ph-[7]TH from 2,13-diiodo[7]thiaheterohelicene.

To a stirred solution of a mixture of 2,13-diiodo[7]thiaheterohelicene<sup>1</sup> (25 mg, 0.038 mmol) and phenylboronic acid (26 mg, 0.21 mmol) in toluene (2.5 mL) were added PEPPSI-*i*Pr (1.0 mg, 0.0015 mmol, 4 mol%), hexadecyltrimethylammonium bromide (CTAB) (1.8 mg, 0.0049 mmol, 13 mol%) and 2 M aqueous Na<sub>2</sub>CO<sub>3</sub> (2.5 mL), and the mixture was stirred for 2 h at reflux temperature. After addition of water, the organic layer was separated. The aqueous layer was extracted with ethyl acetate. The combined organic phases were washed with brine, dried over Na<sub>2</sub>SO<sub>4</sub> and concentrated. The crude product was chromatographed on silica gel column using hexane-chloroform (5:1) as an eluent to give 2,13-diphenyl[7]thiaheterohelicene (14 mg, 64%) as a yellow solid.

Resolution of the enantiomers of Ph-[7]TH was performed on chiral analytical HPLC. The enantiomers were resolved from 5 mg of racemic mixture dissolved in 20 mL of chloroform/*n*-hexane (1:1). This solution was injected in 300  $\mu$ L aliquots onto a CHIRALPAK<sup>®</sup> IG column (4.6 mm I.D.  $\times$  250 mm, 5  $\mu$ m), with chloroform/*n*-hexane (1:1) eluent flowing at 1.0 mL/min at 40°C.

Figure S2(a) shows CD spectra of (*M*)- and (*P*)-Ph-[7]TH in chloroform. CD spectra were recorded on a J-820AC spectropolarimeter (JASCO Co.). We calculated CD spectrum of (*M*)-Ph-[7]TH by the DFT-based calculation using the B3LYP functional and the aug-cc-pVDZ basis set with Gaussian16 program package as shown in Figure S2(b). The spectrum was consistent with the experiments.

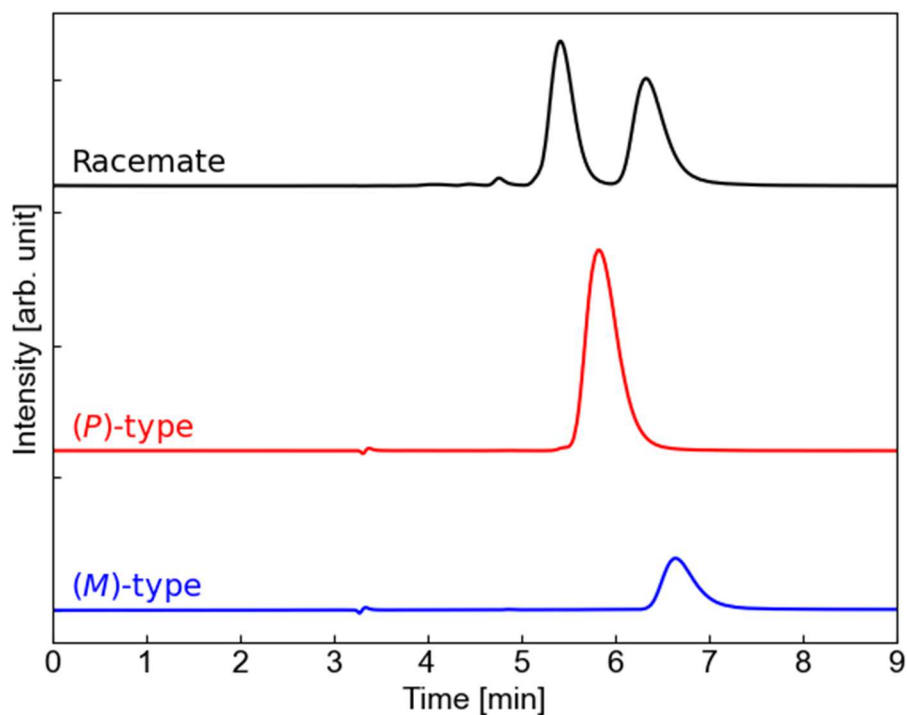

**Figure S1.** HPLC chromatograms of Ph-[7]TH: racemates (black) and (*P*)- (red), and (*M*)-enantiomers (blue).

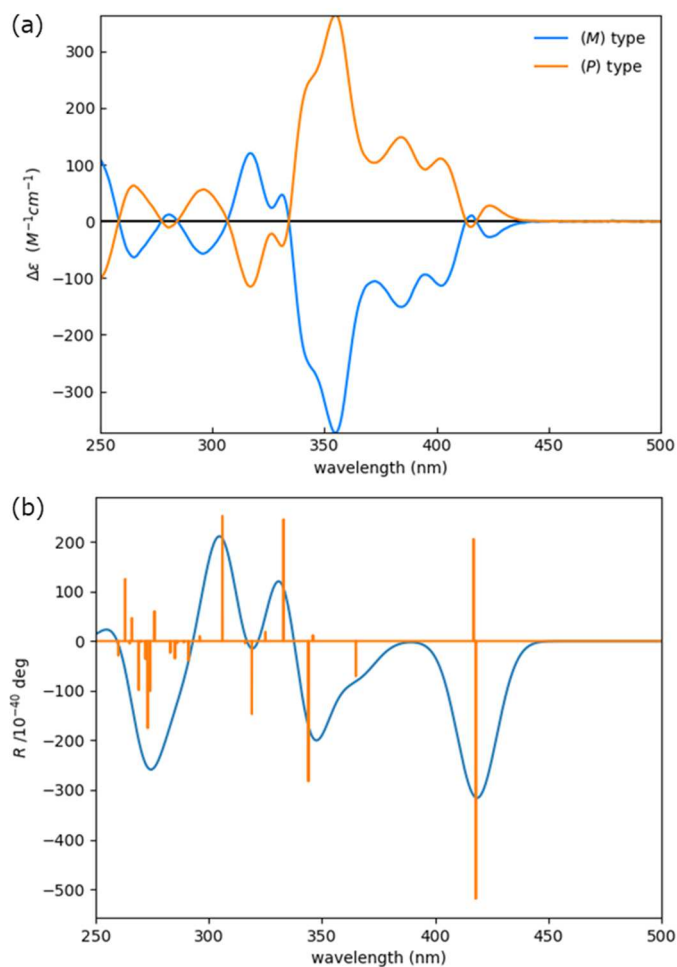

**Figure S2:** (a) CD spectrum of (*M*)- and (*P*)-Ph-[7]TH in chloroform. (b) DFT-based calculated CD spectrum of (*M*)-Ph-[7]TH. The orange sticks indicate the position and rotation strength of calculated states. The blue spectrum was obtained by broadening of gaussian distribution of the rotation strength.

## TERS measurement position

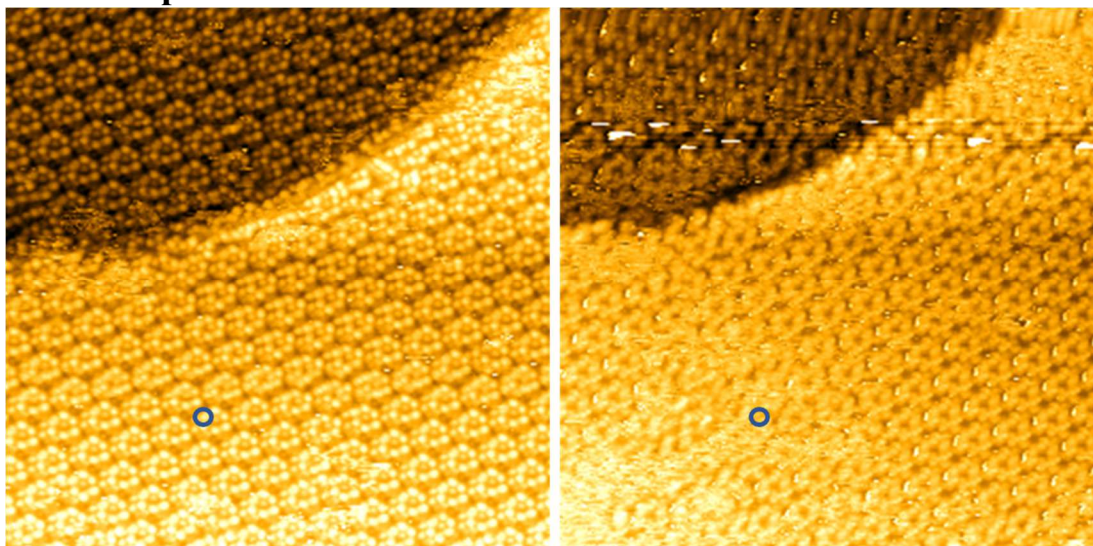

**Figure S3:** STM images of (*M*)-Ph-[7]TH on Ag(111) before (left) and after (right) the TERS measurements of Fig. 3 ( $50 \times 50 \text{ nm}^2$ ,  $-3.0 \text{ V}$ ,  $20 \text{ pA}$ ). TERS spectra were obtained at blue circles.

## Raman active vibration mode

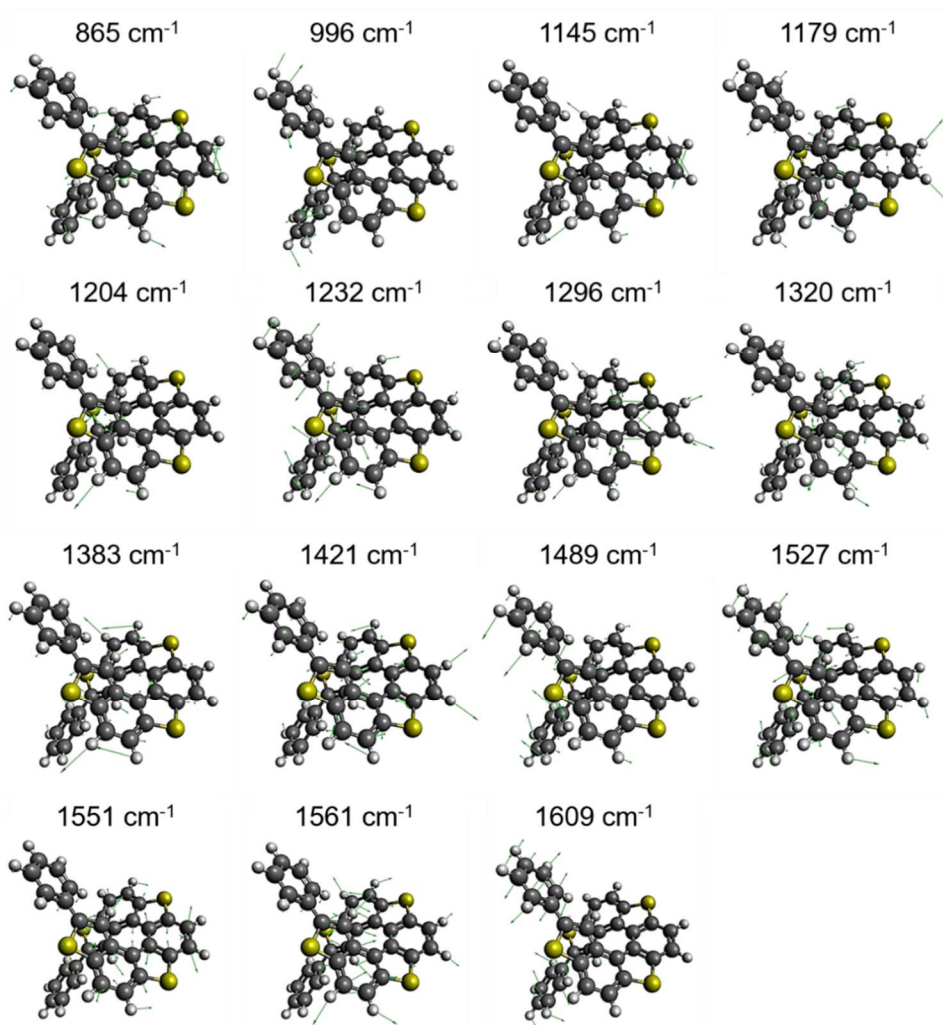

**Figure S4:** Raman active vibration modes of (*M*)-Ph-[7]TH. The green arrows indicate displacement of each vibration modes.

## Sample bias voltage dependence of (*M*)-Ph-[7]TH on Ag(111)

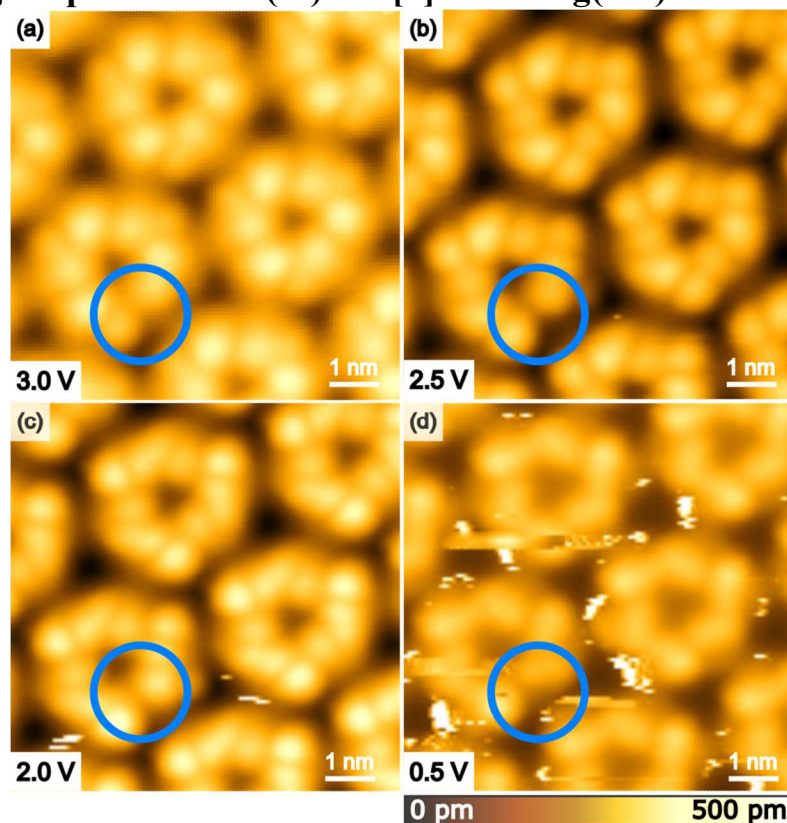

Figure S5: STM images of (*M*)-Ph-[7]TH in the large scale at (a)+3.0 V, (b)+2.5 V, (c)+2.0 V, (d)+0.5 V. All STM images were acquired at 50 pA. Defects indicated by blue circles ensure that these images were obtained at the same area.

## Molecular orbitals

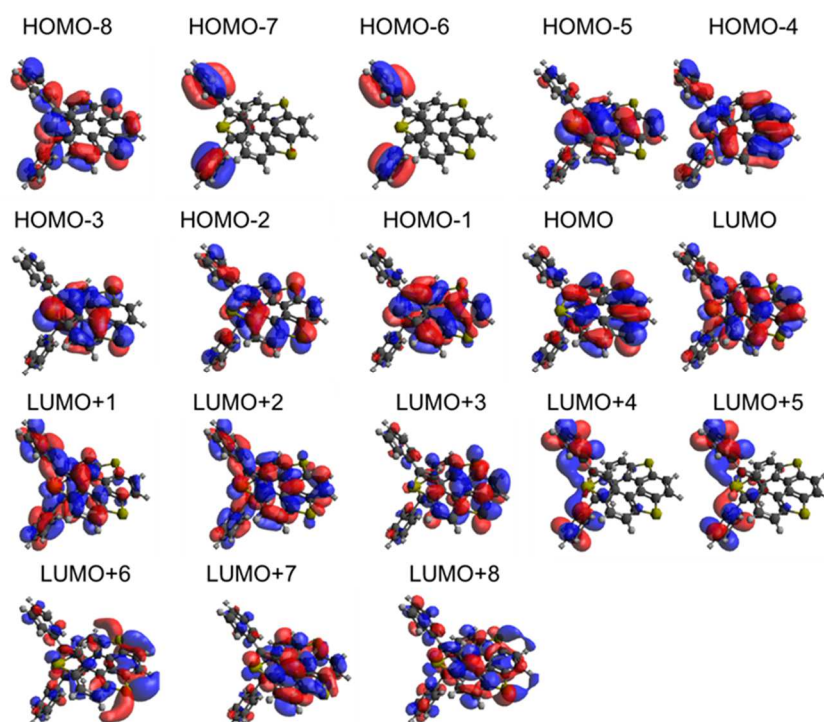

Figure S6: Molecular orbitals of (*M*)-Ph-[7]TH by the DFT-based calculation. Molecular orbitals spread entire (*M*)-Ph-[7]TH except for those for LUMO+5, LUMO+4, HOMO-6, and HOMO-7.

## STM image superimposed with model

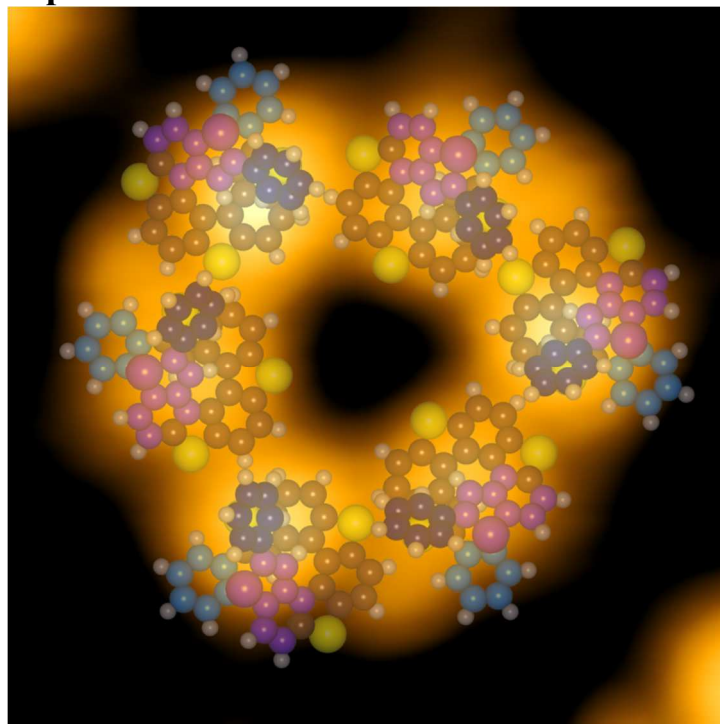

Figure S7: STM images of (*M*)-Ph-[7]TH on the Ag(111) substrate at +3.0 V, 50 pA ( $3.6 \times 3.6 \text{ nm}^2$ ) which is the same as Fig.4(a). The model shown in Fig.6(a) is superimposed.

## Reference

1. A. Bossi, S. Maiorana, C. Graiff, A. Tiripicchio and E. Licandro, *Eur. J. Org. Chem.*, 2007, **2007**, 4499-4509.
